# Supplementary material
Source: Springer Nature journal article supplement (https://www.springermedizin.de/resource/supplementary/12969_2007_31_MOESM1_ESM.pdf/9592244)

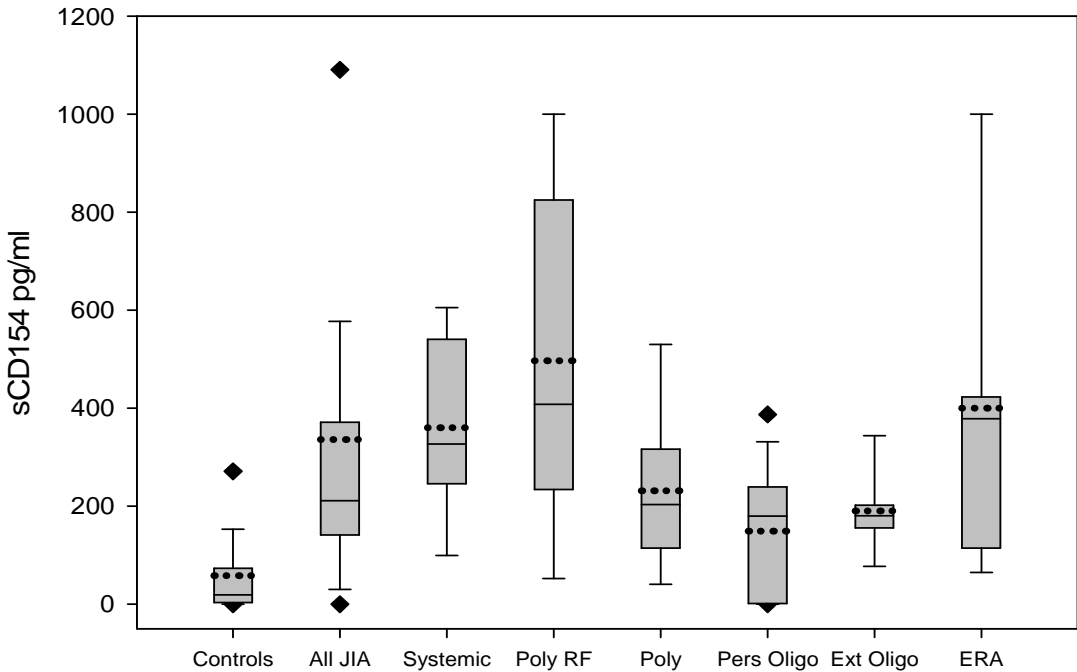

Supplement: MOESM1 [file 9592244]
